# Supplementary material
Source: Elsevier journal article supplement (https://authors.library.caltech.edu/78156/6/mmc5.xlsx)
Supplement: mmc5 [file mmc5.xlsx]

## Sheet: Table S4
Table S4. Water contents and δD of fresh samples from Izu-Bonin-Mariana arc system
location	ID	sample type	H2O	δ D	1	reference
			(wt.%)	(‰)	(‰)
Asuncion	ASUN-20-2_1	Mariana arc melt inclusion	1.78	-49	2.7	Shaw08EPSL275
Asuncion	ASUN-20-2_3B	Mariana arc melt inclusion	2.87	-28	2.2	Shaw08EPSL275
Asuncion	ASUN-20-2_5	Mariana arc melt inclusion	1.01	-53	1.9	Shaw08EPSL275
Asuncion	ASUN-20-2_6⁎	Mariana arc melt inclusion	2.64	-31	1.5	Shaw08EPSL275
Asuncion	ASUN-20-01_2	Mariana arc melt inclusion	4.31	-38	1.9	Shaw08EPSL275
Asuncion	ASUN-20-01_11⁎	Mariana arc melt inclusion	3.8	-45	2	Shaw08EPSL275
Asuncion	ASUN-20-01_13⁎	Mariana arc melt inclusion	4.21	-45	2.1	Shaw08EPSL275
Asuncion	ASUN-20-01_15	Mariana arc melt inclusion	4.16	-49	1.8	Shaw08EPSL275
Agrigan	AGRI2-27	Mariana arc melt inclusion	4.46	-19	3	Shaw08EPSL275
Agrigan	AGRI2-31	Mariana arc melt inclusion	3.43	-51	3.1	Shaw08EPSL275
Agrigan	AGRI2-32	Mariana arc melt inclusion	4.06	-49	2.8	Shaw08EPSL275
Agrigan	AGRI2-38B	Mariana arc melt inclusion	3.59	-39	2.6	Shaw08EPSL275
Agrigan	AGRI2-42	Mariana arc melt inclusion	4.81	-30	2.3	Shaw08EPSL275
Agrigan	AGRI2-43	Mariana arc melt inclusion	5.05	-23	2.4	Shaw08EPSL275
Agrigan	AGRI2-54	Mariana arc melt inclusion	5.06	-38	2	Shaw08EPSL275
Pagan	PAGAN5-2_1	Mariana arc melt inclusion	2.85	-21	2.2	Shaw08EPSL275
Pagan	PAGAN5-2_5	Mariana arc melt inclusion	2.23	-19	2	Shaw08EPSL275
Pagan	PAGAN5-2_15	Mariana arc melt inclusion	1.94	-12	3.3	Shaw08EPSL275
Pagan	PAGAN5-2_18	Mariana arc melt inclusion	1.57	-49	3.3	Shaw08EPSL275
Pagan	PAGAN5-2_24	Mariana arc melt inclusion	1.37	-31	3.3	Shaw08EPSL275
Pagan	PAGAN5-2_78	Mariana arc melt inclusion	2.27	-36	3.6	Shaw08EPSL275
Alamagan	ALA-02_1	Mariana arc melt inclusion	3.81	-12	2.3	Shaw08EPSL275
Alamagan	ALA-02_5⁎	Mariana arc melt inclusion	4.65	-28	2.3	Shaw08EPSL275
Alamagan	ALA-02_6⁎	Mariana arc melt inclusion	4.17	-19	2.1	Shaw08EPSL275
Alamagan	ALA-02_7	Mariana arc melt inclusion	2.82	-36	1.9	Shaw08EPSL275
Alamagan	ALA-03_9	Mariana arc melt inclusion	3.37	-39	2.1	Shaw08EPSL275
Alamagan	ALA-03_16	Mariana arc melt inclusion	2.71	-51	2	Shaw08EPSL275
Guguan	GUG-3_11	Mariana arc melt inclusion	2.45	-47	3	Shaw08EPSL275
Guguan	GUG-3_16	Mariana arc melt inclusion	2.58	-30	3	Shaw08EPSL275
Guguan	GUG-3_38	Mariana arc melt inclusion	2.86	-19	3.8	Shaw08EPSL275
Guguan	GUG-3_41	Mariana arc melt inclusion	3.37	-31	2.9	Shaw08EPSL275
Guguan	GUG-3_44⁎	Mariana arc melt inclusion	3.91	-13	2.9	Shaw08EPSL275
Sarigan	SARI-15-02_2⁎	Mariana arc melt inclusion	3.84	-49	2.1	Shaw08EPSL275
Sarigan	SARI-15-02_10	Mariana arc melt inclusion	3.68	-34	2	Shaw08EPSL275
Sarigan	SARI-15-02_19⁎	Mariana arc melt inclusion	3.32	-20	2.3	Shaw08EPSL275
Sarigan	SARI-15-03_1	Mariana arc melt inclusion	3.58	-23	1.9	Shaw08EPSL275
Sarigan	SARI-15-03_3	Mariana arc melt inclusion	3.84	-33	1.9	Shaw08EPSL275
Sarigan	SARI-15-03_6	Mariana arc melt inclusion	3.45	-51	1.9	Shaw08EPSL275
Anatahan	ANAT04rh_92⁎	Mariana arc melt inclusion	1.77	-32	2.5	Shaw08EPSL275
Anatahan	ANAT04rh_94	Mariana arc melt inclusion	2.59	-32	2.8	Shaw08EPSL275
Anatahan	ANAT-04_42	Mariana arc melt inclusion	2	-55	2.8	Shaw08EPSL275
Anatahan	ANAT-04_43	Mariana arc melt inclusion	1.64	-50	3.2	Shaw08EPSL275
Anatahan	ANAT-04_44	Mariana arc melt inclusion	3.12	-21	3.3	Shaw08EPSL275
Chichi-jima	MD-94	Boninite	2.31	-62		Dobson87EPSL82
Chichi-jima	MD-97	Boninite	2.26	-63		Dobson87EPSL82
Chichi-jima	MD-31	Bronzite andesite	3.03	-60		Dobson87EPSL82
Chichi-jima	MD-46	Bronzite andesite	2.92	-63		Dobson87EPSL82
Chichi-jima	MD-48	Bronzite andesite	2.9	-62		Dobson87EPSL82
Chichi-jima	MD-58	Bronzite andesite	2.82	-63		Dobson87EPSL82
Chichi-jima	MD-60	Bronzite andesite	2.78	-54		Dobson87EPSL82
Chichi-jima	MD-108	Bronzite andesite	2.97	-51		Dobson87EPSL82
Chichi-jima	MD-114	Bronzite andesite	2.86	-67		Dobson87EPSL82
Chichi-jima	MD-94	Boninite glass	2.21	-62		Dobson87EPSL82
Chichi-jima	MD-97	Boninite glass	2.23	-53		Dobson87EPSL82
Chichi-jima	MD-31	Bronzite andesite glass	3.06	-56		Dobson87EPSL82
Chichi-jima	MD-46	Bronzite andesite glass	2.96	-65		Dobson87EPSL82
Chichi-jima	MD-48	Bronzite andesite glass	2.96	-62		Dobson87EPSL82
Chichi-jima	MD-58	Bronzite andesite glass	2.63	-59		Dobson87EPSL82
Chichi-jima	MD-60	Bronzite andesite glass	2.81	-65		Dobson87EPSL82
Chichi-jima	MD-108	Bronzite andesite glass	2.9	-53		Dobson87EPSL82
Chichi-jima	MD-114	Bronzite andesite glass	2.96	-57		Dobson87EPSL82
Mariana Trough	16-1	Back-arc basalt glass	0.64	-46.5		Poreda85EPSL73
Mariana Trough	8-5	Back-arc basalt glass	1.13	-34		Poreda85EPSL73
Mariana Trough	18-B	Back-arc basalt glass	1.25	-33.4		Poreda85EPSL73
Mariana Trough	34-17	Back-arc basalt glass	2.07	-32.2		Poreda85EPSL73
Mariana Trough	46:1-6	Basalt glass		-42.3	2.3	O'Leary07Thesis
Mariana Trough	47:1-5	Basalt glass		-44.7	5.6	O'Leary07Thesis
Mariana Trough	55:1-1	Basalt glass		-45.2	0.8	O'Leary07Thesis
Mariana Trough	73:2-1	Basalt glass		-51.5	5	O'Leary07Thesis
Mariana Trough	ALV 1833-11	Basalt glass		-48.7	14.8	O'Leary07Thesis
Mariana Trough	ALV1846-9	Basalt glass		-73.7	4	O'Leary07Thesis
Mariana Trough	DS18:1-6	Basalt glass		-50.2	1.9	O'Leary07Thesis
Mariana Trough	DS22:2-1	Basalt glass		-56	3.1	O'Leary07Thesis
Mariana Trough	DS74:3-1	Basalt glass		-34.4	0.1	O'Leary07Thesis
Mariana Trough	DS80:25-3	Basalt glass		-40.1	2.1	O'Leary07Thesis
Mariana Trough	DS84:1-1	Basalt glass		-40.1	11.7	O'Leary07Thesis
Mariana Trough	DS86:4-1	Basalt glass		-61.2	0.8	O'Leary07Thesis
Mariana Trough	DS88:2-1	Basalt glass		-37.6	3.6	O'Leary07Thesis
Mariana Trough	DS88-3-1	Basalt glass		-46.8	3.1	O'Leary07Thesis
Mariana Trough	WOK 28	Basalt glass		-36.2		O'Leary07Thesis
Mariana Trough	WOK16-2	Basalt glass		-39.4	2.1	O'Leary07Thesis
Susimu En-echelon	1896-7	Basalt glass	0.97	-35.8		Hochstaedter90EPSL100
Susimu En-echelon	1890-8	Basalt glass	1	-36.6		Hochstaedter90EPSL100
Susimu En-echelon	1890-10	Basalt glass	0.85	-38.6		Hochstaedter90EPSL100
Susimu Shadow Mt	1891-3	Basalt glass	1.3	-40.9		Hochstaedter90EPSL100
Susimu Shadow Mt	1891-7	Basalt glass	1.16	-44.3		Hochstaedter90EPSL100
Susimu Shadow Mt	1891-19	Basalt glass	1.3	-44.6		Hochstaedter90EPSL100
references
Dobson PF, O'Neil JR. 1987. Stable isotope compositions and water contents of boninite series volcanic rocks from Chichi-jima, Bonin islands, Japan. EPSL 82, 75-86.
Hochstaedter AG et al. 1990. Volcanism in the Sumisu Rift, I. Major element, volatile, and stable isotope geochemistry. EPSL 100, 179-194.
O'Leary JA. 2007. PhD thesis. CIT.
Poreda R. 1985. Helium-3 and deuterium in back-arc basalts: Lau Basin and the Mariana Trough. EPSL 73, 244-254.
Sakai R et al. 1990. Origin of waters responsible for serpentinization of the Izu-Ogasawara-Mariana forarc seamounts in view of hydrogen and oxygen isotope ratios. EPSL 100, 291-303.
Shaw AM et al. 2008. Hydrogen isotopes in Mariana arc melt inclusions: Implications for subduction dehydration and the deep-Earth water cycle. EPSL 275, 138-145.
Woodhead JD. 1989. Geochemistry of the Mariana arc (western Pacific): Source composition and processes. CG 76, 1-24.
